# Supplementary figures and images for: The Role of Nuclear Factor of Activated T Cells 5 in Hyperosmotic Stress-Exposed Human Lens Epithelial Cells
Source: MDPI journal article supplement (doi:10.3390/ijms22126296), 2021-06-11

**A**

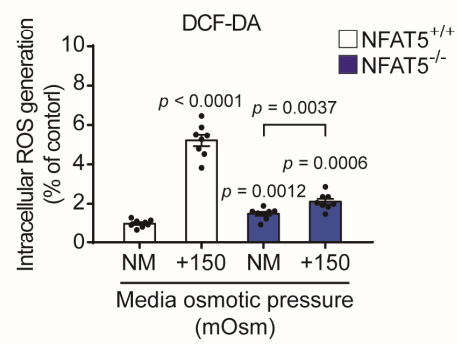

**A**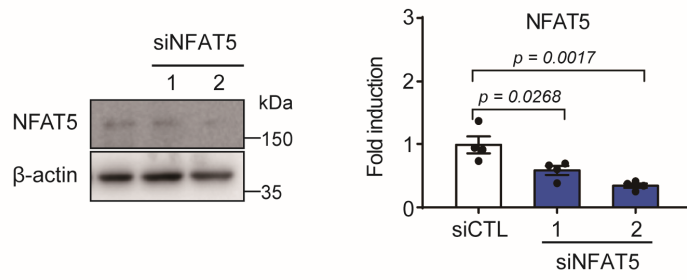**B**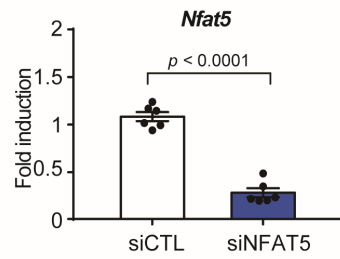**C**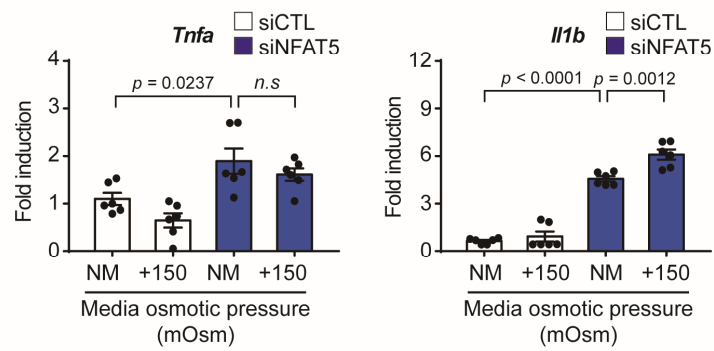**D**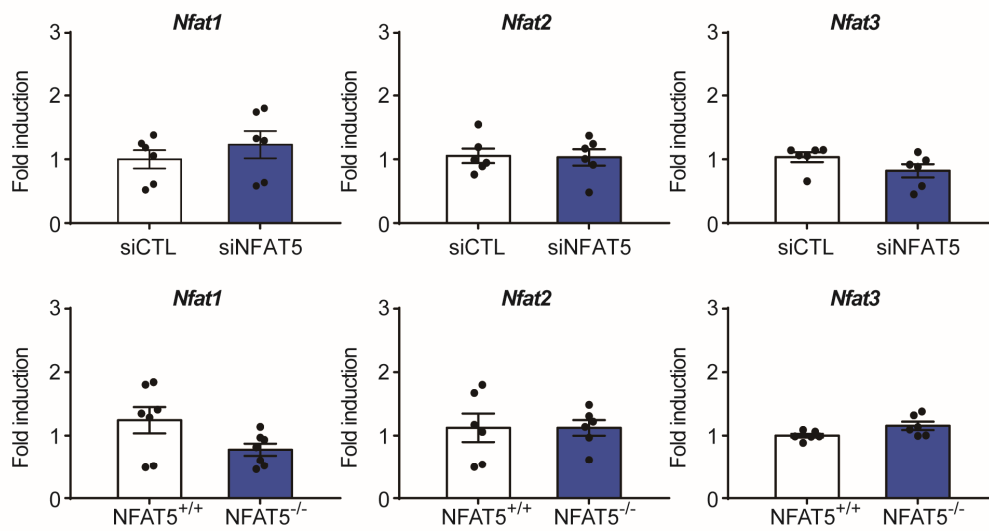

Supplementary Figure 2

Supplement: s1 [file s1]
